# Supplementary material for: Treatment of Leptothrix Cells with Ultrapure Water Poses a Threat to Their Viability
Source: MDPI journal article supplement (doi:10.3390/biology4010050), 2015-01-27
Supplement: s1 [file s1]

# Supplemental Material

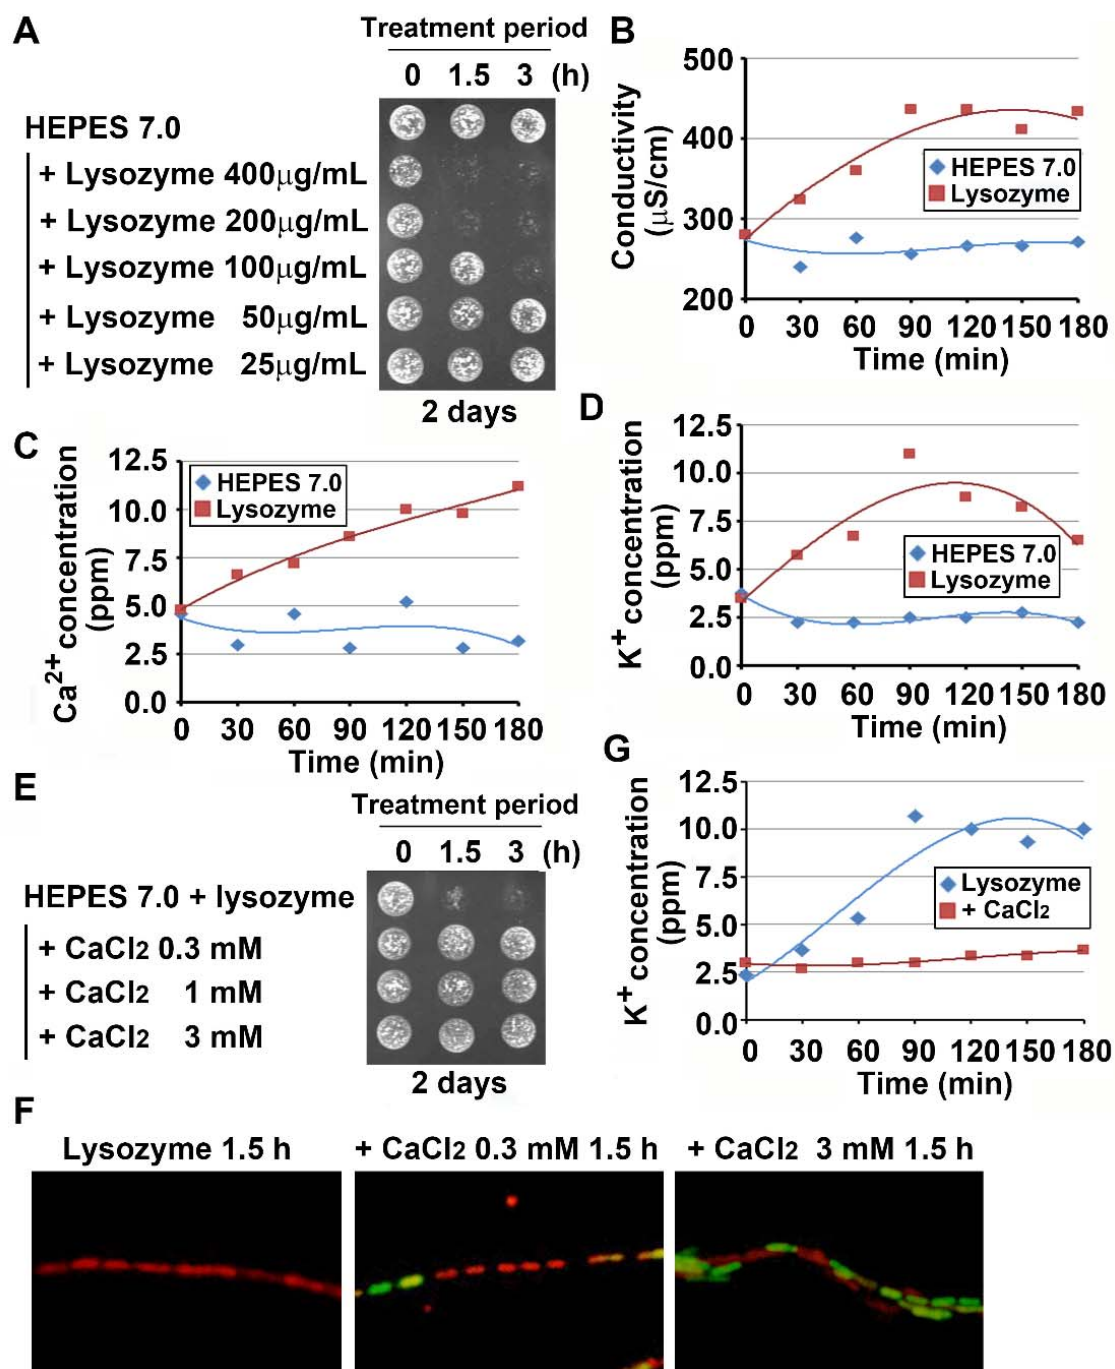

**Figure S1.** Autolysis induced by lysozyme treatment of OUMS1 cells due to damage of peptidoglycan. (A) Colony formation by the cells treated with HEPES7.0 added with lysozyme (0–400 µg/mL). Note no colony formation by the cells treated with HEPES7.0 containing 200 and 400 µg/mL for 1.5 or 3 h. (B) Changes of conductivity of cell suspensions during HEPES7.0 or UPW treatment. (C) Changes of Ca<sup>2+</sup> concentration in cell suspension during HEPES7.0 or UPW treatment. (D) Changes of K<sup>+</sup> concentration in cell suspension during HEPES7.0 or UPW treatment. (E) Suppression of autolysis induced by HEPES7.0 containing lysozyme in the presence of CaCl<sub>2</sub> (G) Suppression of K<sup>+</sup> leakage by Ca<sup>2+</sup> from the autolytic cells treated with HEPES7.0 containing lysozyme. (F) The L/D stain images of the cells treated with HEPES7.0 containing lysozyme and 0–3 mM CaCl<sub>2</sub>.

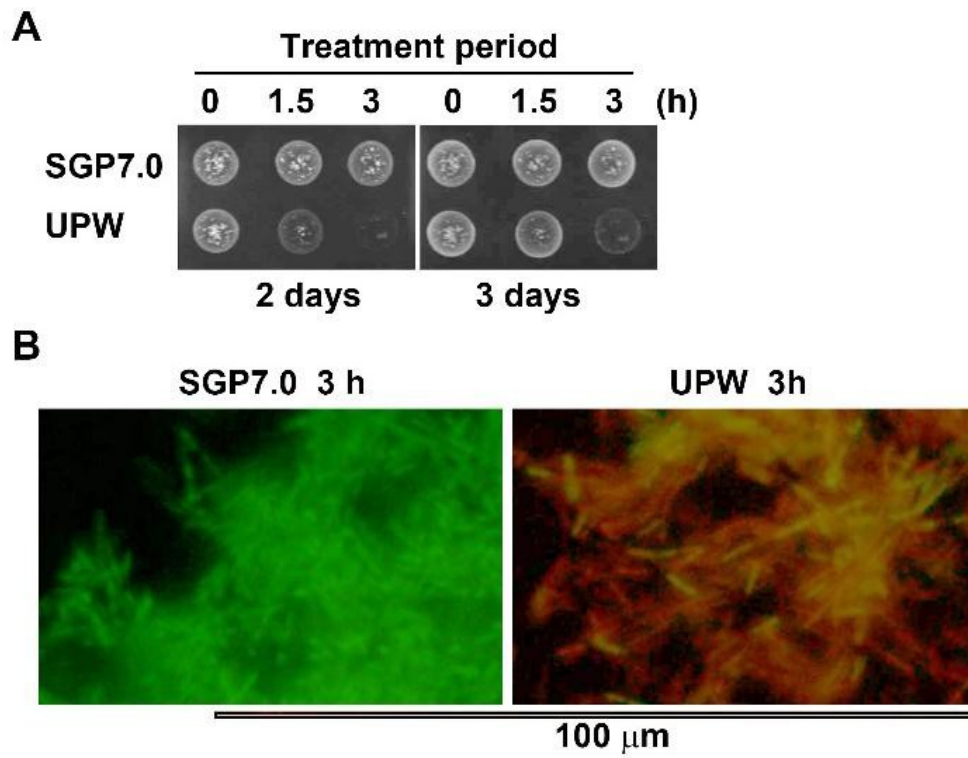

**Figure S2.** Autolysis of SP-6 cells induced by UPW treatment. **(A)** Colony formation by SP-6 cells treated with UPW or SGP7.0 for 0–3 h. Note that the 3 h UPW treatment did not allow the cells to form colony. **(B)** The L/D stain images of SP-6 cells treated with SGP7.0 or UPW for 3 h. Note that the latter treatment resulted in the death of all cells.
